# Supplementary material
Source: PubMed Central journal article supplement (PMC4580968)
Supplement: NIHMS721980-supplement-Suppl.pdf [file NIHMS721980-supplement-Suppl.pdf]

## Urinary Albumin-Creatinine Ratio, Estimated Glomerular Filtration Rate, and All-Cause Mortality Among US Adults With Obstructive Lung Function

*Earl S. Ford, MD, MPH*

CHEST 2015; 147(1):56-67

*Online supplements are not copyedited prior to posting.*

© 2015 AMERICAN COLLEGE OF CHEST PHYSICIANS. Reproduction of this article is prohibited without written permission from the American College of Chest Physicians. See online for more details. DOI: 10.1378/chest.13-2482

**e-Table 1—Baseline characteristics of study variables among adults aged 40-79 years who were included in and excluded from the analyses, National Health and Nutrition Examination Survey III (1988-1994)**

|                                                           | Included (N=5711)                        | N    | Excluded                                 | P-value |
|-----------------------------------------------------------|------------------------------------------|------|------------------------------------------|---------|
|                                                           | Means or percentages<br>(standard error) |      | Means or percentages<br>(standard error) |         |
| Age (years)                                               | 54.8 (0.3)                               | 2775 | 58.7 (0.4)                               | <0.001  |
| Education (years)                                         | 12.4 (0.1)                               | 2725 | 11.4 (0.2)                               | <0.001  |
| Number of drinks (/month)                                 | 9.6 (0.6)                                | 2774 | 6.3 (0.5)                                | <0.001  |
| Systolic blood pressure (mm Hg)                           | 125.0 (0.3)                              | 2379 | 126.9 (0.8)                              | 0.019   |
| High-density lipoprotein cholesterol (mmol/L)             | 1.3 (<0.1)                               | 2324 | 1.3 (<0.1)                               | 0.543   |
| Non-high-density lipoprotein cholesterol (mmol/L)         | 4.3 (<0.1)                               | 2322 | 4.3 (<0.1)                               | 0.423   |
| Body mass index (kg/m <sup>2</sup> )                      | 27.1 (0.1)                               | 2746 | 28.5 (0.2)                               | <0.001  |
| Albumin-creatinine ratio (mg/g)                           | 6.3 (0.2)                                | 2550 | 8.8 (0.4)                                | <0.001  |
| Glomerular filtration rate (mL/min/1.73 m <sup>2</sup> )  | 89.3 (0.3)                               | 2759 | 77.3 (1.4)                               | <0.001  |
| Forced expiratory volume in one second (ml)               | 2921.7 (18.6)                            | 2116 | 2427.7 (26.8)                            | <0.001  |
| Forced vital capacity (ml)                                | 3914.7 (19.2)                            | 2116 | 3174.2 (36.5)                            | <0.001  |
| FEV1/FVC                                                  | 0.74 (<0.01)                             | 2116 | 0.77 (<0.01)                             | <0.001  |
| Men (%)                                                   | 48.7 (0.9)                               | 2775 | 42.7 (1.4)                               | 0.001   |
| White (%)                                                 | 83.1 (1.1)                               | 2775 | 69.0 (1.9)                               | <0.001  |
| High school graduate or higher (%)                        | 74.7 (1.4)                               | 2725 | 64.6 (1.7)                               | <0.001  |
| Current smoker (%)                                        | 23.7 (0.9)                               | 2775 | 27.1 (1.6)                               | 0.056   |
| Moderate-vigorous leisure-time physical activity (%)      | 42.0 (1.8)                               | 2775 | 31.4 (1.3)                               | <0.001  |
| Vitamin or mineral supplement use during past 30 days (%) | 45.6 (1.3)                               | 2772 | 43.3 (1.7)                               | 0.180   |
| C-reactive protein >3 mg/L (%)                            | 31.6 (1.5)                               | 2333 | 43.1 (2.3)                               | <0.001  |
| ≥Good health status (%)                                   | 83.8 (0.9)                               | 2771 | 68.3 (1.8)                               | <0.001  |
| Diabetes (%)                                              | 9.3 (0.5)                                | 2773 | 17.3 (1.4)                               | <0.001  |
| History of myocardial infarction (%)                      | 4.7 (0.4)                                | 2667 | 8.3 (0.7)                                | <0.001  |
| History of stroke (%)                                     | 2.2 (0.3)                                | 2770 | 4.2 (0.5)                                | 0.002   |

*Online supplements are not copyedited prior to posting.*
